# Supplementary material
Source: Springer Nature journal article supplement (https://www.springermedizin.de/resource/supplementary/12906_2010_503_MOESM3_ESM.pdf/9519772)

**A**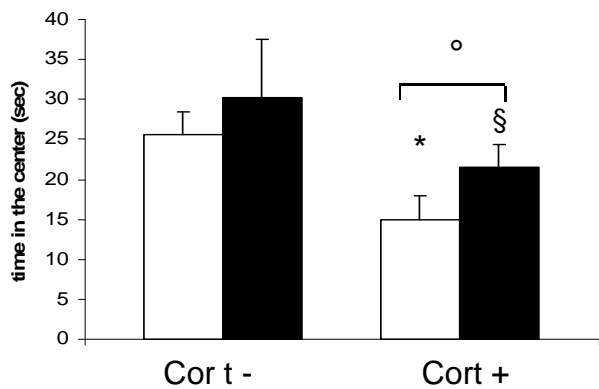**B**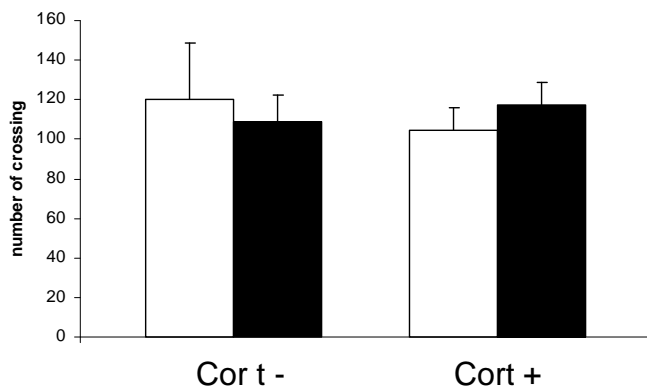**C**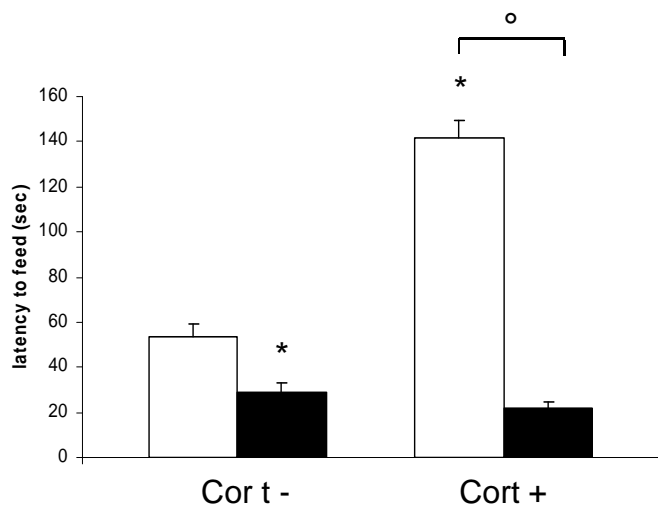**D**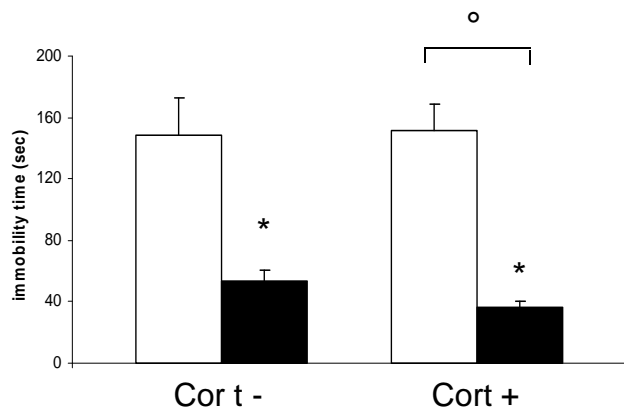

□ Vehicle

■ *H. perforatum*

Supplement: MOESM3 [file 9519772]
